# Supplementary material for: Expression Patterns of the Heat Shock Protein 90 (Hsp90) Gene Suggest Its Possible Involvement in Maintaining the Dormancy of Dinoflagellate Resting Cysts
Source: Int J Mol Sci. 2021 Oct 13;22(20):11054. doi: 10.3390/ijms222011054 (PMC8538777; doi:10.3390/ijms222011054)
Supplement: Supplementary file 1 [file ijms-22-11054-s001.zip › Supplementary Figures.pdf]

## Supplementary Figures

```

1  TCCGTAGCCATTTTGGCTCAAGTTTGGCTCAAGCAACTTACATCAAGCTCGTGTAGATTGCCTCGTCTTGCCTCTGCCAGCATTGCCGGAGAGTCT
102 GCGCA[ATC]GCGGAGACATTTGCTTCAATGCGGACATCCAGCAGCTGATGAGCTTGATCATCAACACCTTCTACTCCAACAAGGAGATCTTCTCCGAGA
1  M A E T F A F N A D I Q Q L M S L I I N T F Y S N K E I F L R E
202 GCTCATCTCCAATGCCTCAGATGCCTTGGACAAGATCCGCTACGAGTCCATCACGGAACCGGAGAAGATTGAGGCGCAGCCCACTTCTACATCAAGATC
33  L I S N A S D A L D K I R Y E S I T D P E K I E A Q P N F Y I K I
302 ATCCCTGACAAGACCAACTCCACCATCACCATCGAGGACTCTGGCATCGGCATGACGAGAAGATTGAGCTGATCAACAACCTCGGCACCATCGCCAAGTCC
66  I P D K T N S T I T I E D S G I G M T K N E L I N N L G T I A K S
401 GGCACCAAGGCTTTCATGGAGGCCATGGCAGCGGGCGGCGACATCTCCATGATCGGCCAGTTTCGGCGTGGGCTTCTACTCCGCTACCTCGTGGCAGAC
99  G T K A F M E A M A A G G D I S M I G Q F G V G F Y S A Y L V A D
500 AAGATCCGCGTTGTGAGCAAGCACAACGACGACGAGCAGTACATCTGGGAGTGGGGGCTGGCGGCTCCTTACGGTGCAGAAGGACACGGAGATGGT
132 K I R V V S K H N D D E Q Y I W E S G A G G S F T V Q K D T E M V
598 GCACGGCGAGATCAAGCGCGGCACGAAGATCATCTGCTACCTGAAGGAGGACCATCGGAGTTCCTCGAGGAGCGCGCCTGAAGGACCTGGTGAAGA
165 H G E I K R G T K I I C Y L K E D Q S E F L E E R R L K D L V K
696 AGCATTCCGAATTTATTTGGCTTCCCGATCGAGCTCTACGTGGAGAAGTCCAAGGAGAAGGAGGTACCGACTCGGAAGAGGAGGAGGAGAGAAGAG
197 K H S E F I G F P I E L Y V E K S K E K E V T D S E E E E E E K K
794 GAGGAGGGCGCCGAGGGTGACGAGCCGAAGATTGAGGAGGTGGACGAGGAGAAGGAGAAGGAAGAAGAAGAAAACCAAGAAGGTCAAGGA
230 E E G A E G D E P K I E E V D E E K E K E E K K K K T K K V K E
889 AGTTTCTCATGAGTGGGAACAGCTGAACAAGAACAAGCCCTCTGGATGCGGAAGTCGGAGGACGTGACGAATGAGGAGTATGCCTCTTCTACAAGTC
262 V S H E W E Q L N K N K P L W M R K S E D V T N E E Y A S F Y K S
988 GCTCTCGAATGATTTGGGAGGACCATCTTGCCGTGAAGCACTTCAGCGTCGAGGGGCGAGCTCGAGTTCGAGCCTTGTCTTCTGTCGCGCGCCGCGCACCT
295 L S N D W E D H L A V K H F S V E G Q L E F R A L L F V P R R A P
1088 TTCGACCTCTTTGAGTCCAAGAAGAAGGGAACAACATCAAGTTGTACGTGCGCGCGCTTTCATTATGGACGATTGGCATGAGCTCATGCCGAGTGGC
328 F D L F E S K K K R N N I K L Y V R R V F I M D D C D E L M P E W
1188 TCAACATGGTCAAGGGCGCTGCGGATTCGGAGGATCTGCCGTGAACATCTCTCGAGAGACCTTGCAGCAGAACCAAGATCCTCCGCGTCATCAAGAAAA
361 L N M V K G V V D S E D L P L N I S R E T L Q Q N K I L R V I K K N
1288 CCTTGTGAAGAAGTGTGTTGGAGATGTTGTGATGATCGCGGAGAAGAAGGATGACTACAAGAAGTGTACGAGCAGTTTGGCAAGTGCTTGAAGCTCGGC
395 L V K K C L E M F A E I A E K K D D Y K K C Y E Q F G K C L K L G
1388 GTCCACGAAGATTCCACCAACCGAACCAAGGTTGACAGATTGCTCCGCTTCCACACTTCCAAGTCTGGCGATGAGCAGATCAGCTTGAAGGAGTATGTGG
428 V H E D S T N R T K V A E L L R F H T S K S G D E Q I S L K E Y V
1488 ACCGCATGAAAGAGGGCCAGAACGACATCTACTACATCACTGGCGAGAGCATCACGGCCGTGTCTCTCGCCGTTTTTGGAGACCTTCGCAAGAAGGG
461 D R M K E G Q N D I Y Y I T G E S I T A V S S S P F L E T L R K K G
1588 CTTGGAGGTGTTGATCATGTTGGACCCGGTTGACGAGTATGCGGTGCAGCAGTTGAAGGAGTTCGATGGTAAGAAGCTCAAGTCCACGACCAAGGAGGG
495 L E V L Y M V D P V D E Y A V Q Q L K E F D G K K L K S T T K E G
1687 CTTGGACATTGAGGACGAGGATGAGAAGAAGAAGCTTGAGGAATTGAAGGCCGAGTTTGAGCCACTTACGAAGCTCATGAAGGAGGTTCTTGGCGACAA
528 L D I E D E D E K K K L E E L K A E F E P L T K L M K E V L G D K
1786 GGTGGAGAAGGTCTCTGAGCTCGCGCATGGCTGACTCCCCCTTGGCTGCTCACGACCTCGGAGTATGGCTGGTCGGCAACATGGAACGCATCATGAAG
561 V E K V L V S S R M A D S P C V L T T S E Y G W S A N M E R I M K
1886 GCGCAGGCTTTGCGCGACAACTCTATGACGTCGTACATGGTGTGCAAGAAGACCATGGAGGTGAATCCGAAGCACTCCATCATGACGGAGTTGAAGAAGA
594 A Q A L R D N S M T S Y M V S K K T M E V N P K H S I M T E L K K
1986 AGGCTGCCGCGGACAAGTCTGACAAGACTGTGAAGGACCTGATCTGGCTGCTTTCGACACCTCGCTGCTCACGTCCGGCTTCAACCTGGACGAGCCAC
627 K A A A D K S D K T V K D L I W L F D T S L L T S G F N L D E P T
2086 GCAGTTCTGCTGGCCGATCCACCGCATGATCAAGCTCGGCCCTCAGCATCGACGATGACGATGAGGGCCTCGGTGACGATGACGACCTTCCCCGCTCGAA
661 Q F A G R I H R M I K L G L S I D D D D E G L G D D D D L P P L E
2186 GAGGTGAGGGCGCTGCGGATGAGGCCTCCAAGATGGAGGAGGTGAT[GA]GGCGCCATGCAGTGAGCGACGGCCTCCACGGGCCGCCGACTTGGG
694 E V E G A A D E A S K M E F Y D -
2284 CCGCTGGTATCAATGAGGCTCAGCACAATATCACACGACGAGCTCCGCCGACCGCATGGGAGGAGCGTAGTCGAAGGTGCTACATGCGAGCGCGT
2383 CCGCCCGCTTGGGCGCGCGTAGAGACCCAGGACCTTGTGATGTACAGTGAGAGAGGACGAGCAAAAAAAAAAAAAAAAAAAAAA

```

**Supplementary Figure S1.** The full-length cDNA sequence and deduced amino acid sequence of *StHsp90* (Accession number: MZ779085). Sequences are numbered on the left. The start and stop codon are boxed. The canonical dinoflagellate spliced leader (DinoSL) is underlined in the 5'-UTR. The characteristic Hsp90 signatures are shaded in gray and the conserved LXXLL sequence is marked with double underline. The cytosolic Hsp90-specific motif at C-terminus is highlighted with triangles.

|         |                                     |            |                        |          |             |                    |        |             |             |         |     |
|---------|-------------------------------------|------------|------------------------|----------|-------------|--------------------|--------|-------------|-------------|---------|-----|
| StHsp90 | M-----ETFAFADIQQLMSLIINTFYSNKEFLREL | SN         | SDALDKIRYES            | TD       | PK          | EAQPNFYIKIIPDKINST | T      | EDSGIGMTKNL | NNLG        | 93      |     |
| PmHsp90 | M-----ETFAFADIQQLMSLIINTFYSNKEFLREL | SN         | SDALDKIRYES            | TD       | PK          | EAQPNFYIKIIPDKINST | T      | EDSGIGMTKNL | NNLG        | 93      |     |
| PdHsp90 | M-----ETFAFADIQQLMSLIINTFYSNKEFLREL | SN         | SDALDKIRYES            | TD       | PK          | EAQPNFYIKIIPDKINST | T      | EDSGIGMTKNL | NNLG        | 93      |     |
| CcHsp90 | M-----ETFAFADIQQLMSLIINTFYSNKEFLREL | SN         | SDALDKIRYES            | TD       | PK          | EAQPNFYIKIIPDKINST | T      | EDSGIGMTKNL | NNLG        | 93      |     |
| AcHsp90 | M-----ETFAFADIQQLMSLIINTFYSNKEFLREL | SN         | SDALDKIRYES            | TD       | PK          | EAQPNFYIKIIPDKINST | T      | EDSGIGMTKNL | NNLG        | 93      |     |
| KvHsp90 | M-----ETFAFADIQQLMSLIINTFYSNKEFLREL | SN         | SDALDKIRYES            | TD       | PK          | EAQPNFYIKIIPDKINST | T      | EDSGIGMTKNL | NNLG        | 93      |     |
| MpHsp90 | M-----ETFAFADIQQLMSLIINTFYSNKEFLREL | SN         | SDALDKIRYES            | TD       | PK          | EAQPNFYIKIIPDKINST | T      | EDSGIGMTKNL | NNLG        | 93      |     |
| AaHsp90 | MADVQMDAD                           | ETFAFAE    | INQLMSLIINTFYSNKEFLREL | SN       | SDALDKIRYES | TD                 | SK     | LDQPELFI    | RLVDPKNN    | 100     |     |
| *****   |                                     |            |                        |          |             |                    |        |             |             |         |     |
| StHsp90 | TIASGTR                             | FMEAMAAGD  | SMIGQFGVGFYS           | AYL      | ADK         | RVVSK              | NDDEQY | WES         | GAGGSFTVQK  | DTMVEGE | 192 |
| PmHsp90 | TIASGTR                             | FMEAMAAGD  | SMIGQFGVGFYS           | AYL      | ADK         | RVVSK              | NDDEQY | WES         | GAGGSFTVQK  | DTMVEGE | 192 |
| PdHsp90 | TIASGTR                             | FMEAMAAGD  | SMIGQFGVGFYS           | AYL      | ADK         | RVVSK              | NDDEQY | WES         | GAGGSFTVQK  | DTMVEGE | 192 |
| CcHsp90 | TIASGTR                             | FMEAMAAGD  | SMIGQFGVGFYS           | AYL      | ADK         | RVVSK              | NDDEQY | WES         | GAGGSFTVQK  | DTMVEGE | 192 |
| AcHsp90 | TIASGTR                             | FMEAMAAGD  | SMIGQFGVGFYS           | AYL      | ADK         | RVVSK              | NDDEQY | WES         | GAGGSFTVQK  | DTMVEGE | 192 |
| KvHsp90 | TIASGTR                             | FMEAMAAGD  | SMIGQFGVGFYS           | AYL      | ADK         | RVVSK              | NDDEQY | WES         | GAGGSFTVQK  | DTMVEGE | 192 |
| MpHsp90 | TIASGTR                             | FMEAMAAGD  | SMIGQFGVGFYS           | AYL      | ADK         | RVVSK              | NDDEQY | WES         | GAGGSFTVQK  | DTMVEGE | 192 |
| AaHsp90 | TIASGTR                             | FMEALQAGAD | SMIGQFGVGFYS           | AYL      | ADK         | RVVSK              | NDDEQY | WES         | GAGGSFTVTRD | VDGEP   | 197 |
| *****   |                                     |            |                        |          |             |                    |        |             |             |         |     |
| StHsp90 | DLVKKHSEF                           | IGPPIELLY  | VE                     | SKEKE    | TS          | DEDEEE             | EE     | KEE         | GAEGD       | BPK     | 290 |
| PmHsp90 | DLVKKHSEF                           | IGPPIELLY  | VE                     | SKEKE    | TS          | DEDEEE             | EE     | KEE         | GAEGD       | BPK     | 290 |
| PdHsp90 | DLVKKHSEF                           | IGPPIELLY  | VE                     | SKEKE    | TS          | DEDEEE             | EE     | KEE         | GAEGD       | BPK     | 291 |
| CcHsp90 | DLVKKHSEF                           | IGPPIELLY  | VE                     | SKEKE    | TS          | DEDEEE             | EE     | KEE         | GAEGD       | BPK     | 292 |
| AcHsp90 | DLVKKHSEF                           | IGPPIELLY  | VE                     | SKEKE    | TS          | DEDEEE             | EE     | KEE         | GAEGD       | BPK     | 291 |
| KvHsp90 | DLVKKHSEF                           | IGPPIELLY  | VE                     | SKEKE    | TS          | DEDEEE             | EE     | KEE         | GAEGD       | BPK     | 290 |
| MpHsp90 | DLVKKHSEF                           | IGPPIELLY  | VE                     | SKEKE    | TS          | DEDEEE             | EE     | KEE         | GAEGD       | BPK     | 290 |
| AaHsp90 | DLVKKHSEF                           | ISPIELLY   | VE                     | SKEKE    | TS          | DEDEEE             | EE     | KEE         | GAEGD       | BPK     | 288 |
| *****   |                                     |            |                        |          |             |                    |        |             |             |         |     |
| StHsp90 | FYKSL                               | NDWEDHL    | AKHF                   | SVEGQLEF | RA          | LFVP               | RA     | PF          | DL          | FES     | 390 |
| PmHsp90 | FYKSL                               | NDWEDHL    | AKHF                   | SVEGQLEF | RA          | LFVP               | RA     | PF          | DL          | FES     | 390 |
| PdHsp90 | FYKSL                               | NDWEDHL    | AKHF                   | SVEGQLEF | RA          | LFVP               | RA     | PF          | DL          | FES     | 391 |
| CcHsp90 | FYKSL                               | NDWEDHL    | AKHF                   | SVEGQLEF | RA          | LFVP               | RA     | PF          | DL          | FES     | 392 |
| AcHsp90 | FYKSL                               | NDWEDHL    | AKHF                   | SVEGQLEF | RA          | LFVP               | RA     | PF          | DL          | FES     | 391 |
| KvHsp90 | FYKSL                               | NDWEDHL    | AKHF                   | SVEGQLEF | RA          | LFVP               | RA     | PF          | DL          | FES     | 390 |
| MpHsp90 | FYKSL                               | NDWEDHL    | AKHF                   | SVEGQLEF | RA          | LFVP               | RA     | PF          | DL          | FES     | 390 |
| AaHsp90 | FYKSL                               | NDWEDHL    | AKHF                   | SVEGQLEF | RA          | LFVP               | RA     | PF          | DL          | FES     | 388 |
| *****   |                                     |            |                        |          |             |                    |        |             |             |         |     |
| StHsp90 | IKKNLVKK                            | C          | EMFAEI                 | AEKK     | LDYK        | KFY                | Q      | FKCK        | KL          | G       | 490 |
| PmHsp90 | IKKNLVKK                            | C          | EMFAEI                 | AEKK     | LDYK        | KFY                | Q      | FKCK        | KL          | G       | 490 |
| PdHsp90 | IKKNLVKK                            | C          | EMFAEI                 | AEKK     | LDYK        | KFY                | Q      | FKCK        | KL          | G       | 491 |
| CcHsp90 | IKKNLVKK                            | C          | EMFAEI                 | AEKK     | LDYK        | KFY                | Q      | FKCK        | KL          | G       | 492 |
| AcHsp90 | IKKNLVKK                            | C          | EMFAEI                 | AEKK     | LDYK        | KFY                | Q      | FKCK        | KL          | G       | 491 |
| KvHsp90 | IKKNLVKK                            | C          | EMFAEI                 | AEKK     | LDYK        | KFY                | Q      | FKCK        | KL          | G       | 490 |
| MpHsp90 | IKKNLVKK                            | C          | EMFAEI                 | AEKK     | LDYK        | KFY                | Q      | FKCK        | KL          | G       | 490 |
| AaHsp90 | IKKNLVKK                            | C          | EMFNEI                 | AEKK     | LDYK        | KFY                | Q      | FKCK        | KL          | G       | 487 |
| *****   |                                     |            |                        |          |             |                    |        |             |             |         |     |
| StHsp90 | RKKGL                               | EVL        | YMD                    | PD       | DE          | Y                  | AV     | Q           | LKE         | FDGKKL  | 588 |
| PmHsp90 | RKKGL                               | EVL        | YMD                    | PD       | DE          | Y                  | AV     | Q           | LKE         | FDGKKL  | 588 |
| PdHsp90 | RKKGL                               | EVL        | YMD                    | PD       | DE          | Y                  | AV     | Q           | LKE         | FDGKKL  | 589 |
| CcHsp90 | RKKGL                               | EVL        | YMD                    | PD       | DE          | Y                  | AV     | Q           | LKE         | FDGKKL  | 590 |
| AcHsp90 | RKKGL                               | EVL        | YMD                    | PD       | DE          | Y                  | AV     | Q           | LKE         | FDGKKL  | 589 |
| KvHsp90 | RKKGL                               | EVL        | YMD                    | PD       | DE          | Y                  | AV     | Q           | LKE         | FDGKKL  | 588 |
| MpHsp90 | RKKGL                               | EVL        | YMD                    | PD       | DE          | Y                  | AV     | Q           | LKE         | FDGKKL  | 587 |
| AaHsp90 | RKKGL                               | EVL        | YMD                    | DA       | DE          | Y                  | AV     | Q           | LKE         | FDGKKL  | 587 |
| *****   |                                     |            |                        |          |             |                    |        |             |             |         |     |
| StHsp90 | ERIMKAA                             | AL         | R                      | DS       | MT          | YS                 | YMS    | SKKT        | ME          | NPK     | 688 |
| PmHsp90 | ERIMKAA                             | AL         | R                      | DS       | MT          | YS                 | YMS    | SKKT        | ME          | NPK     | 688 |
| PdHsp90 | ERIMKAA                             | AL         | R                      | DS       | MT          | YS                 | YMS    | SKKT        | ME          | NPK     | 690 |
| CcHsp90 | ERIMKAA                             | AL         | R                      | DS       | MT          | YS                 | YMS    | SKKT        | ME          | NPK     | 690 |
| AcHsp90 | ERIMKAA                             | AL         | R                      | DS       | MT          | YS                 | YMS    | SKKT        | ME          | NPK     | 689 |
| KvHsp90 | ERIMKAA                             | AL         | R                      | DS       | MT          | YS                 | YMS    | SKKT        | ME          | NPK     | 688 |
| MpHsp90 | ERIMKAA                             | AL         | R                      | DS       | MT          | YS                 | YMS    | SKKT        | ME          | NPK     | 687 |
| AaHsp90 | ERIMKAA                             | AL         | R                      | DS       | MT          | YS                 | YMS    | SKKT        | ME          | NPK     | 686 |
| *****   |                                     |            |                        |          |             |                    |        |             |             |         |     |
| StHsp90 | L                                   | P          | P                      | L        | E           | E                  | V      | G           | A           | A       | 709 |
| PmHsp90 | L                                   | P          | P                      | L        | E           | E                  | V      | G           | A           | A       | 709 |
| PdHsp90 | L                                   | P          | P                      | L        | E           | E                  | V      | G           | A           | A       | 710 |
| CcHsp90 | L                                   | P          | P                      | L        | E           | E                  | V      | G           | A           | A       | 711 |
| AcHsp90 | L                                   | P          | P                      | L        | E           | E                  | V      | G           | A           | A       | 710 |
| KvHsp90 | L                                   | P          | P                      | L        | E           | E                  | V      | G           | A           | A       | 709 |
| MpHsp90 | L                                   | P          | P                      | L        | E           | E                  | V      | G           | A           | A       | 708 |
| AaHsp90 | M                                   | P          | E                      | L        | E           | E                  | -      | -           | D           | A       | 704 |

**Supplementary Figure S2.** Alignment and comparison of Hsp90 deduced amino acid sequences from *Scrippsiella trochoidea* (StHsp90, the present sequence) with other registered counterparts from dinoflagellates *Prorocentrum minimum* (AFD34191; PmHsp90), *Prorocentrum donghaiense* (AST24279; PdHsp90), *Cryptothecodinium cohnii* (AAM02974; CcHsp90), *Margalefidinium polykrikoides* (AKS44062; MpHsp90), *Amphidinium carterae* (ADV03069; AcHsp90), *Karlodinium veneticum* (ABI14419; KvHsp90), and higher plant *Arabidopsis thaliana* (CAA68885; AaHsp90). Sequences are numbered on the right. The typical Hsp90 signatures and the cytosolic Hsp90-specific motif are highlighted with arrows and triangles, respectively. Identical and similar amino acid residues are black and gray shaded, respectively. Deletions are indicated by dashes.

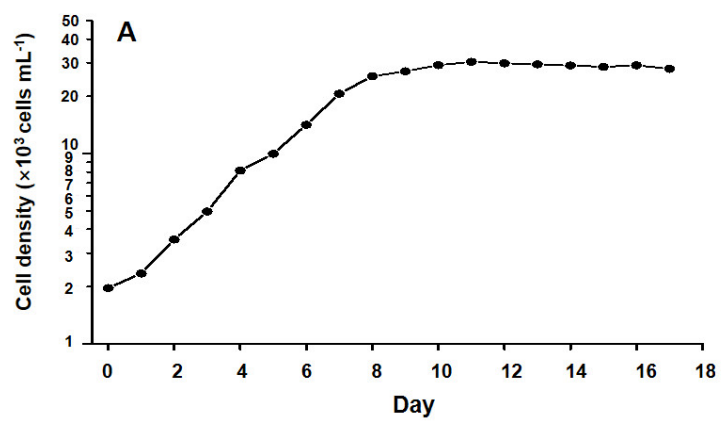

**Supplementary Figure S3.** The growth curve of *Scrippsiella trochoidea* (strain IOCAS-St-1). The day of inoculation was recorded as day 0.
