# Supplementary material for: Expression Patterns of the Heat Shock Protein 90 (Hsp90) Gene Suggest Its Possible Involvement in Maintaining the Dormancy of Dinoflagellate Resting Cysts
Source: Int J Mol Sci. 2021 Oct 13;22(20):11054. doi: 10.3390/ijms222011054 (PMC8538777; doi:10.3390/ijms222011054)
Supplement: Supplementary file 1 [file ijms-22-11054-s001.zip › Supplementary Table S1.xlsx]

## Sheet: Table S1
Table S1 Details for the Hsp90 sequences used in the phylogenetic analysis
	Species	Accession number
	Neospora caninum	XP_003881046
	Besnoitia besnoiti	XP_029216216
	Eimeria maxima	CBX88549
	Eimeria tenella	O44001
	Eimeria necatrix	XP_013438488
	Eimeria praecox	CDI87740
	Cryptosporidium parvum	XP_626924
	Cryptosporidium tyzzeri	TRY52403
	Cryptosporidium ubiquitum	XP_028875532
	Cryptosporidium felis	KAF7458746
	Toxoplasma gondii	XP_002368278
	Plasmodium reichenowi	CDO63555
	Plasmodium gaboni	XP_018642449
	Plasmodium vinckei	EUD73992
	Plasmodium yoelii	XP_022811909
	Plasmodium malariae	XP_028859990
	Stylonychia lemnae	CDW75268
	Tetrahymena thermophila	XP_001009780
	Tetrahymena pyriformis	AAG00567
	Ichthyophthirius multifiliis	XP_004035743
	Pseudourostyla cristata	AAY67878
	Tetrahymena bergeri	AAR27543
	Perkinsus marinus	AAR27545
	Perkinsus olseni	KAF4693587
	Perkinsus chesapeaki	KAF4677224
	Perkinsus marinus	XP_002777167
	Prorocentrum minimum	AFD34191
	Prorocentrum donghaiense	AST24279
	Margalefidinium polykrikoides	AKS44060
	Margalefidinium polykrikoides	AKS44062
	Crypthecodinium cohnii	AAM02974
	Amphidinium carterae	ADV03069
	Karlodinium veneficum	ABI14419
	Gymnodinium fuscum	ADP65788
	Polarella glacialis	ADP65790
	Protoperidinium crassipes	ADP65791
	Protoperidinium steidingerae	ADP65792
	Scrippsiella trochoidea	ADP65799
	Spiniferodinium galeiforme	ADP65800
	Togula britannica	ADP65802
	Heterocapsa triquetra	AAR27541
	Lessardia elongata	AAR27542
	Prorocentrum micans	AAR27546
	Amphidinium carterae	ACF95812
	Heterocapsa triquetra	AAX10941
	Karenia brevis	CAJ75749
	Karenia mikimotoi	CAJ75750
	Karlodinium veneficum	CAJ75751
	Alexandrium tamarense	CAJ75752
	Lepidodinium chlorophorum	CAJ75753
	Kryptoperidinium foliaceum	AAV32830
	Noctiluca scintillans	BAF75973
	Alexandrium fundyense	AFX83612
	Alexandrium minutum	AFX83613
	Amphidinium massartii	AFX83614
	Azadinium spinosum	AFX83615
	Gymnodinium aureolum	AFX83616
	Pentapharsodinium dalei	AFX83617
	Ulva pertusa	BAL45643
	Arabidopsis thaliana	CAA68885
